# Supplementary material for: Effect of Static Load on the Nucleus Pulposus of Rabbit Intervertebral Disc Motion Segment in an Organ Culture
Source: Biomed Res Int. 2016 Oct 31;2016:2481712. doi: 10.1155/2016/2481712 (PMC5107879; doi:10.1155/2016/2481712)
Supplement: Supplementary file 1 — Figure S1: Detailed view of the specimen culturing conditions. Figure S2: Loading and organ culturing apparatuses for the rabbit IVD motion segments (diagrammatic sketch). [file 2481712.f1.xls]

## Sheet: Sheet1
tuzi-GAPDH
TU-agg
COL2A1
